# Supplementary material for: Chemical constituents from the seeds ofNigella glanduliferaand their hypoglycemic activities
Source: Royal Society of Chemistry journal article supplement (doi:10.1039/d2ra02628g), 2022-01-01
Supplement: d2ra02628g1.pdf [file d2ra02628g1.pdf]

## Supplementary Information

### Chemical constituents from the seeds of *Nigella glandulifea* Freyn et Sint and their hypoglycemic activities

Qingqing Li <sup>‡a</sup>, Jing Xu <sup>‡a</sup>, Yiyu Chen <sup>a</sup>, Wenli Xie <sup>a</sup>, Gui Mei <sup>a</sup>, Xueni Li <sup>a</sup>,

Yu Chen <sup>b\*</sup>, Guangzhong Yang <sup>a\*</sup>

<sup>a</sup> *School of Pharmaceutical Sciences, South-Central Minzu University, Wuhan 430074,*

*P. R. China*

<sup>b</sup> *College of Chemistry and Material Sciences, South-Central Minzu University,*

*Wuhan 430074, P. R. China*

---

\*Corresponding authors. Tel./fax: +86 27 6784 1196

E-mail address: chenyuwh888@126.com (Y. Chen); yanggz888@126.com (G. Yang)

<sup>‡</sup> These authors contributed equally to this work.

## Contents

|                                                                                                          |     |
|----------------------------------------------------------------------------------------------------------|-----|
| Figure S1: $^1\text{H}$ -NMR (600 MHz, $\text{CD}_3\text{OD}$ ) spectrum of compound 1 .....             | S3  |
| Figure S2: $^{13}\text{C}$ -NMR (150 MHz, $\text{CD}_3\text{OD}$ ) spectrum of compound 1 .....          | S3  |
| Figure S3: $^{13}\text{C}$ -NMR-DEPT ( $\theta=135^\circ$ ) spectrum of compound 1 .....                 | S4  |
| Figure S4: HSQC spectrum of compound 1 .....                                                             | S4  |
| Figure S5: HMBC spectrum of compound 1 .....                                                             | S5  |
| Figure S6: $^1\text{H}$ - $^1\text{H}$ COSY spectrum of compound 1 .....                                 | S5  |
| Figure S7: ROESY spectrum of compound 1 .....                                                            | S6  |
| Figure S8: UV spectrum of compound 1 .....                                                               | S6  |
| Figure S9: HR-ESI-MS of compound 1 .....                                                                 | S7  |
| Figure S10: CD spectrum of compound 1 .....                                                              | S7  |
| Figure S11: $^1\text{H}$ -NMR (600 MHz, $\text{C}_5\text{D}_5\text{N}$ ) spectrum of compound 3 .....    | S8  |
| Figure S12: $^{13}\text{C}$ -NMR (150 MHz, $\text{C}_5\text{D}_5\text{N}$ ) spectrum of compound 3 ..... | S8  |
| Figure S13: $^{13}\text{C}$ -NMR-DEPT ( $\theta=135^\circ$ ) spectrum of compound 3 .....                | S9  |
| Figure S14: HSQC spectrum of compound 3 .....                                                            | S9  |
| Figure S15: HMBC spectrum of compound 3 .....                                                            | S10 |
| Figure S16: $^1\text{H}$ - $^1\text{H}$ COSY spectrum of compound 3 .....                                | S10 |
| Figure S17: ROESY spectrum of compound 3 .....                                                           | S11 |
| Figure S18: UV spectrum of compound 3 .....                                                              | S11 |
| Figure S19: HR-ESI-MS of compound 3 .....                                                                | S12 |
| Figure S20: CD spectrum of compound 3 .....                                                              | S12 |
| 1. Computational methods .....                                                                           | S13 |
| 2. Energies and Coordinates .....                                                                        | S16 |
| 3. Experimental and calculated ECD spectra .....                                                         | S21 |

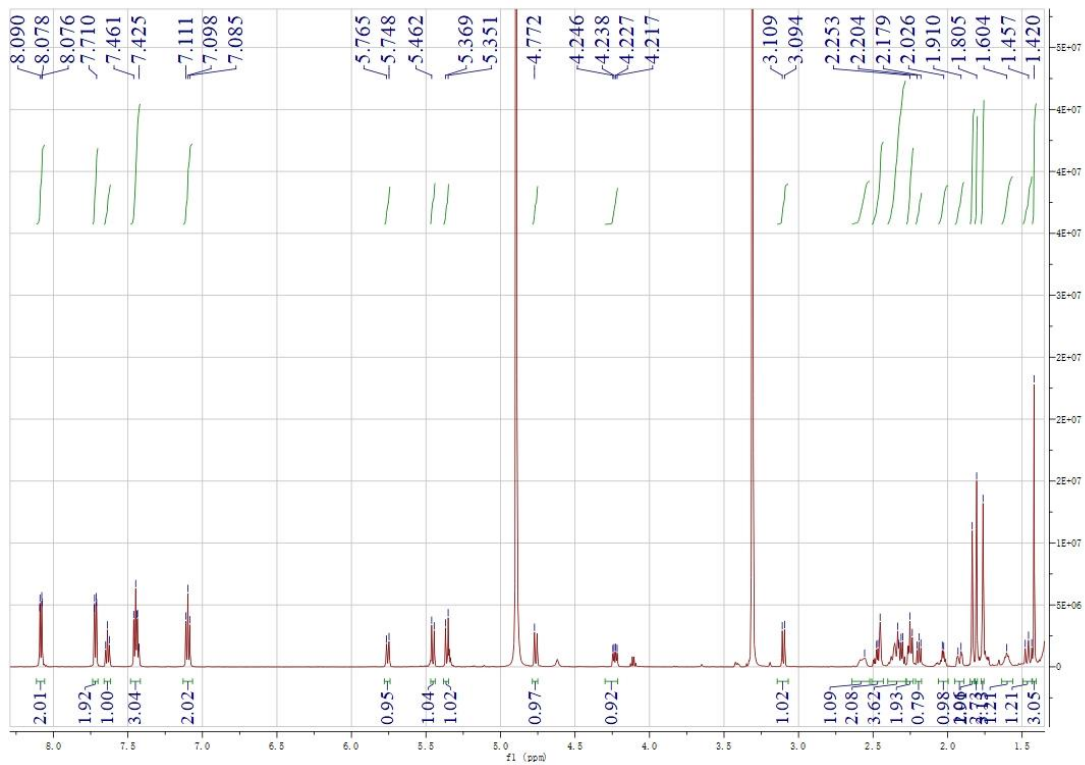

Figure S1:  $^1\text{H-NMR}$  (600 MHz,  $\text{CD}_3\text{OD}$ ) spectrum of compound 1

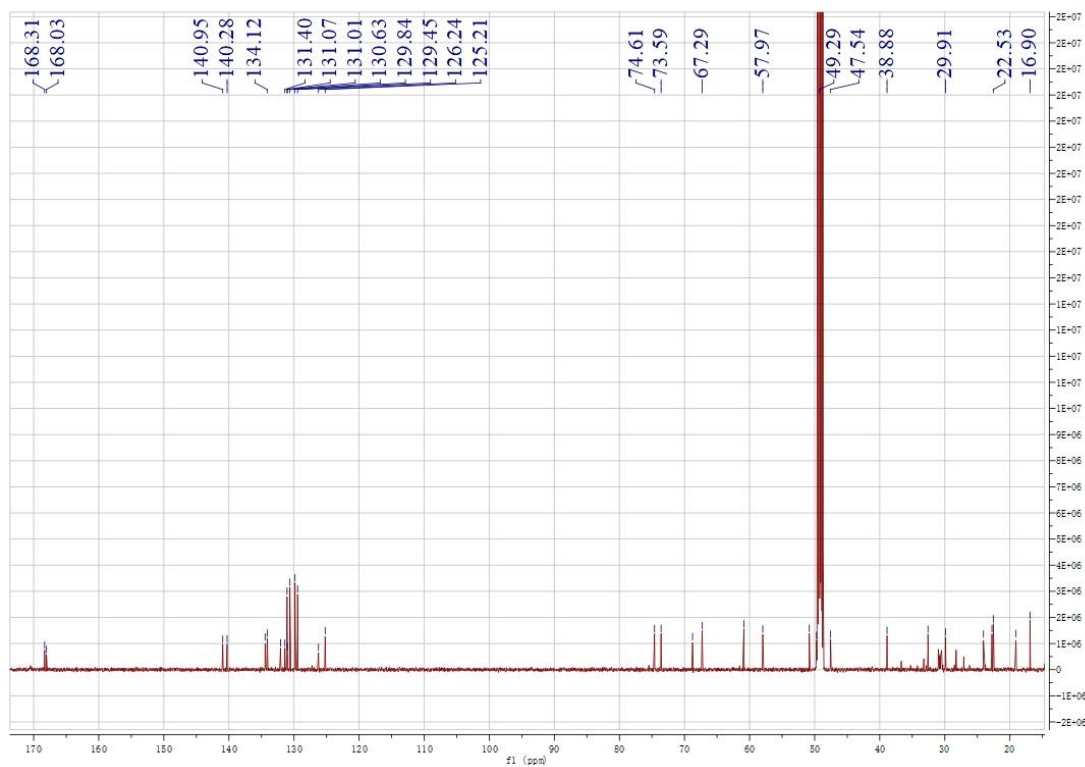

Figure S2:  $^{13}\text{C-NMR}$  (150 MHz,  $\text{CD}_3\text{OD}$ ) spectrum of compound 1

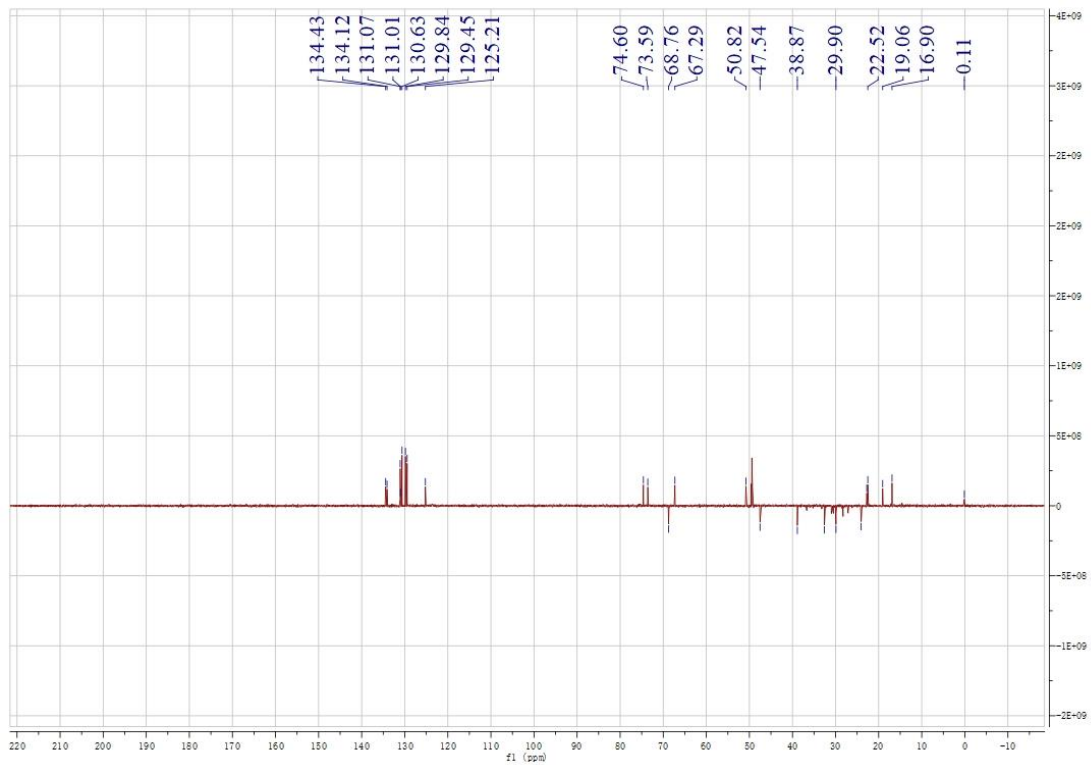

Figure S3:  $^{13}\text{C}$ -NMR-DEPT ( $\theta=135^\circ$ ) spectrum of compound 1

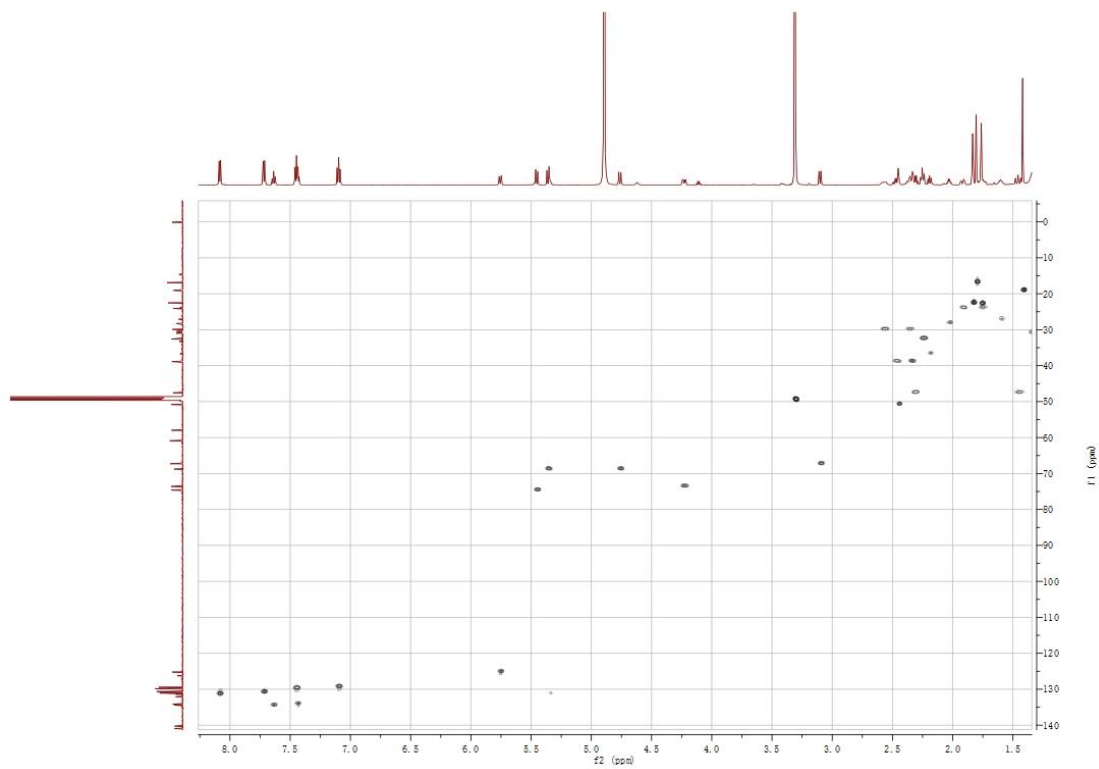

Figure S4: HSQC spectrum of compound 1

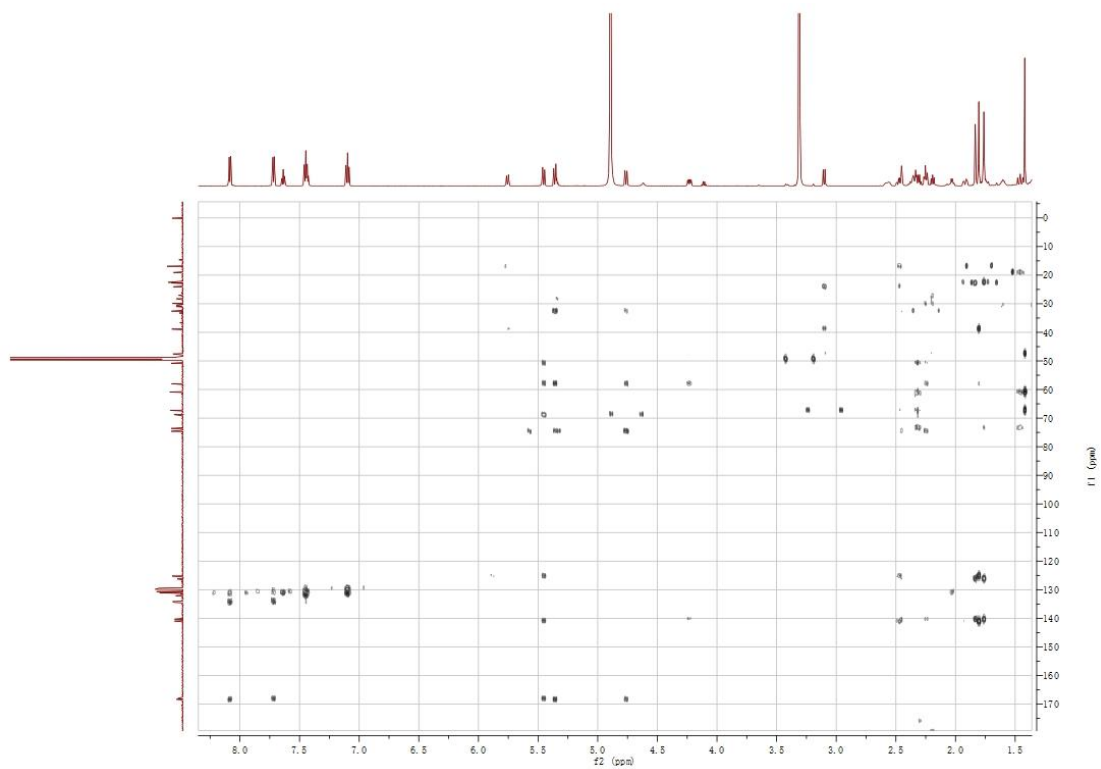

**Figure S5: HMBC spectrum of compound 1**

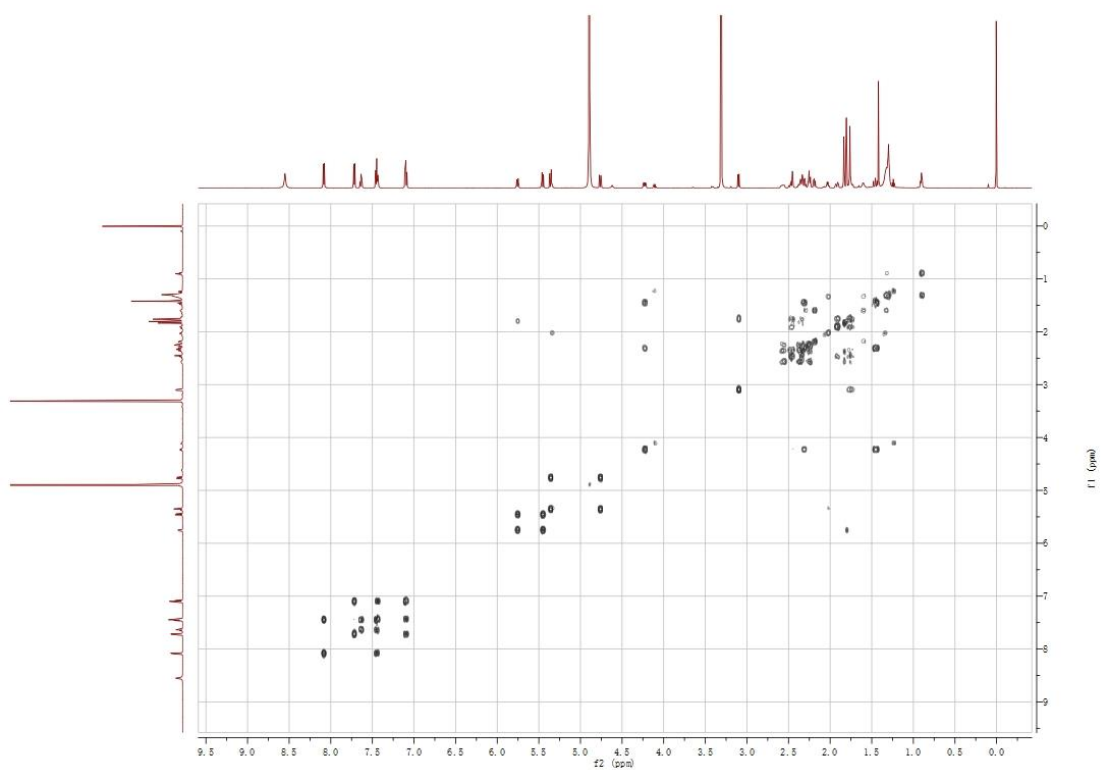

**Figure S6:  $^1\text{H}$ - $^1\text{H}$  COSY spectrum of compound 1**

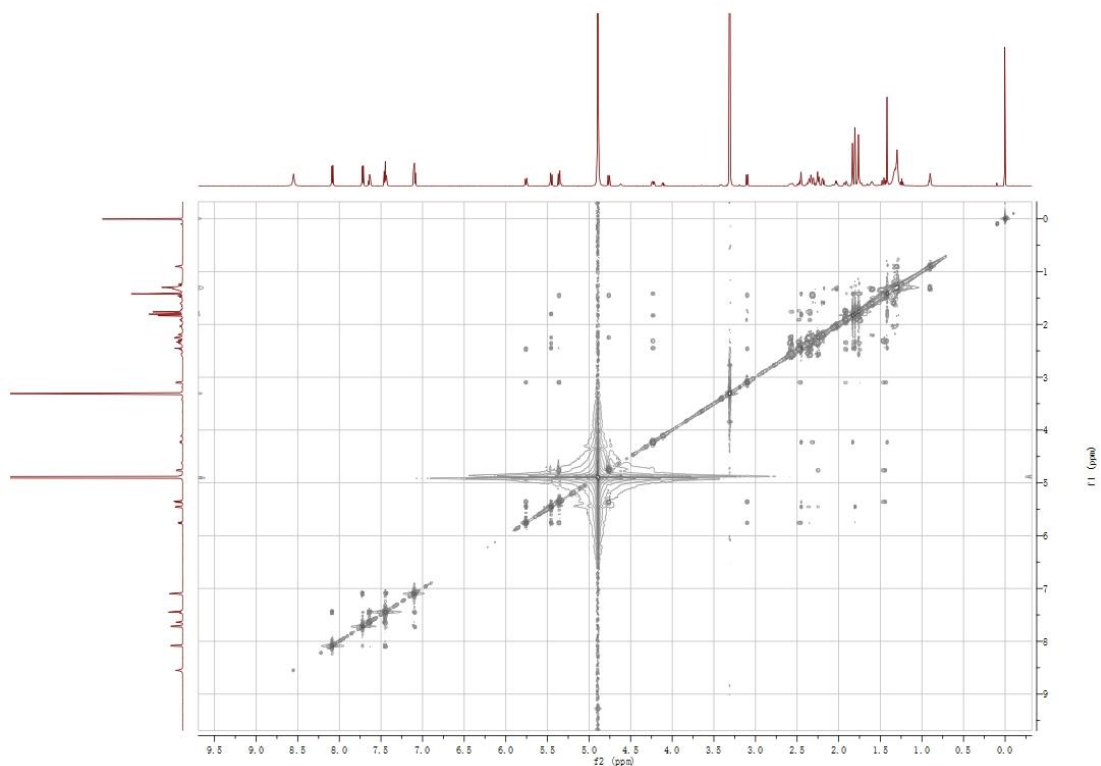

**Figure S7: ROESY spectrum of compound 1**

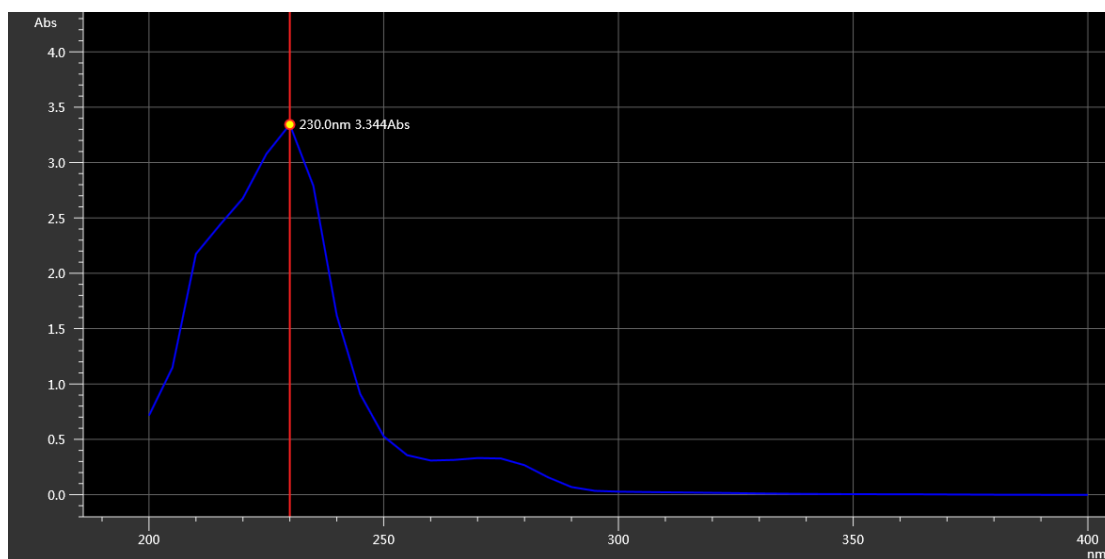

**Figure S8: UV spectrum of compound 1**

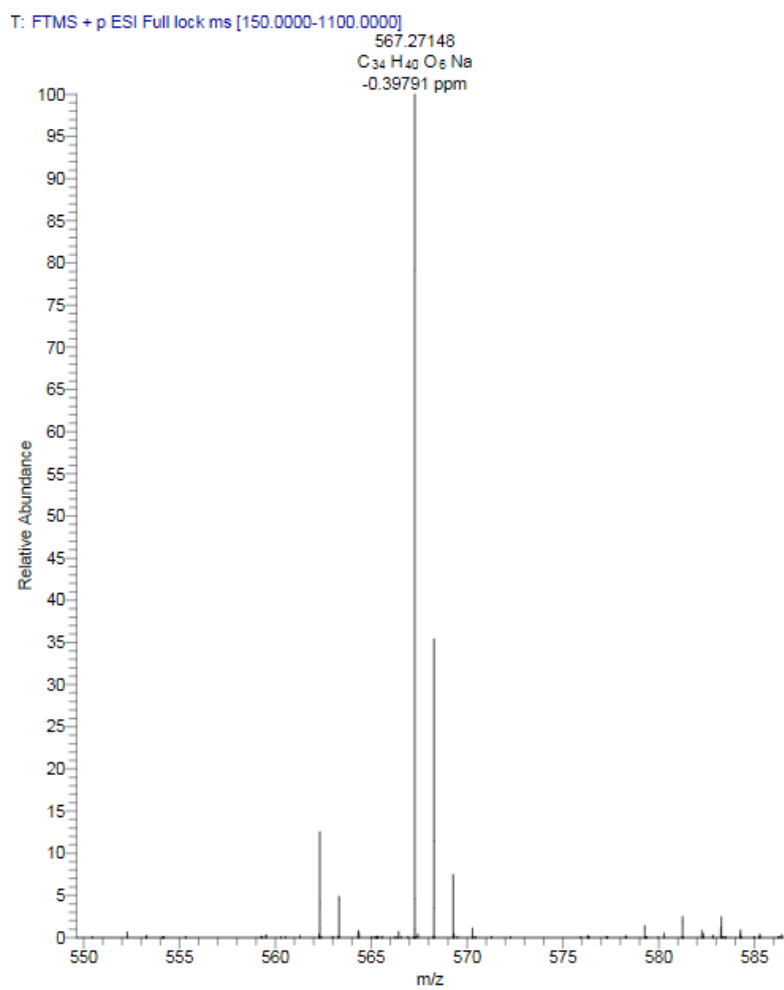

**Figure S9: HR-ESI-MS of compound 1**

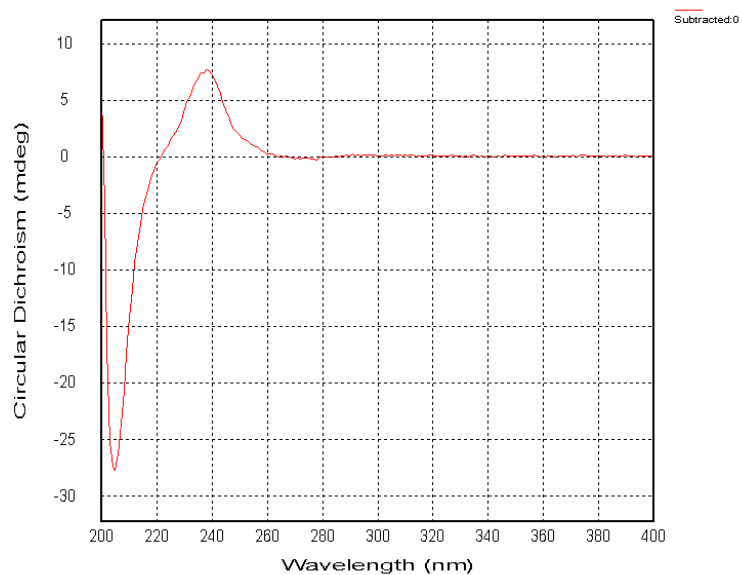

**Figure S10: CD spectrum of compound 1**

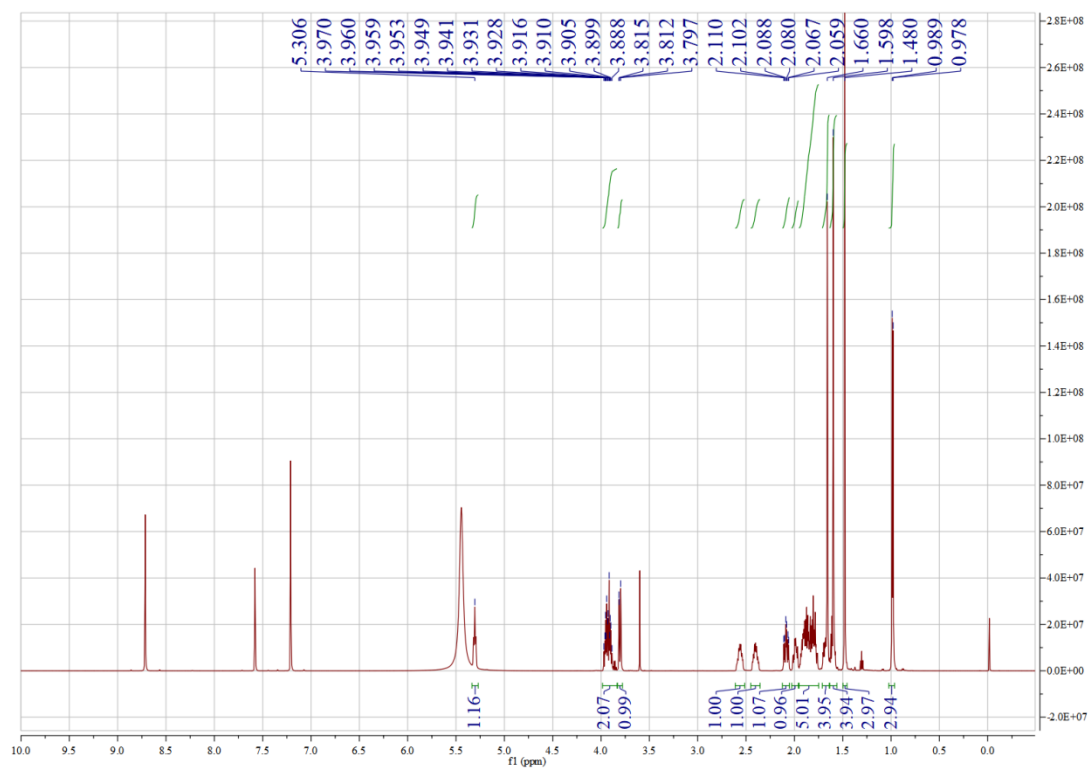

Figure S11:  $^1\text{H-NMR}$  (600 MHz,  $\text{C}_5\text{D}_5\text{N}$ ) spectrum of compound 3

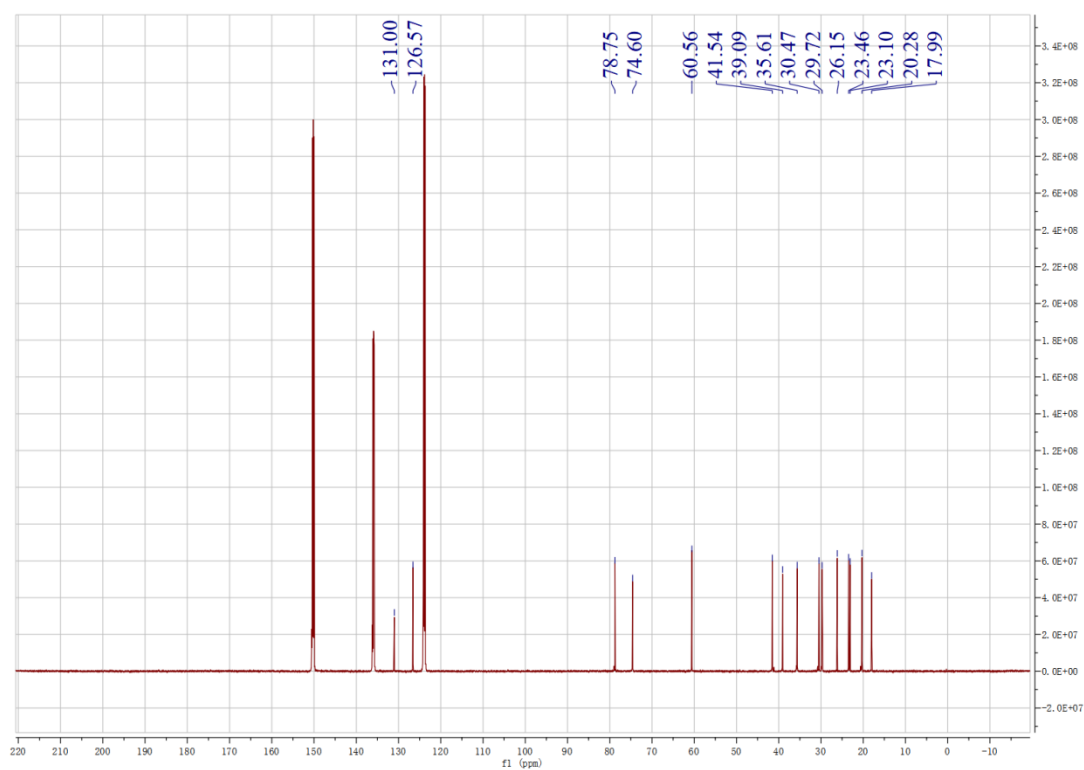

Figure S12:  $^{13}\text{C-NMR}$  (150 MHz,  $\text{C}_5\text{D}_5\text{N}$ ) spectrum of compound 3



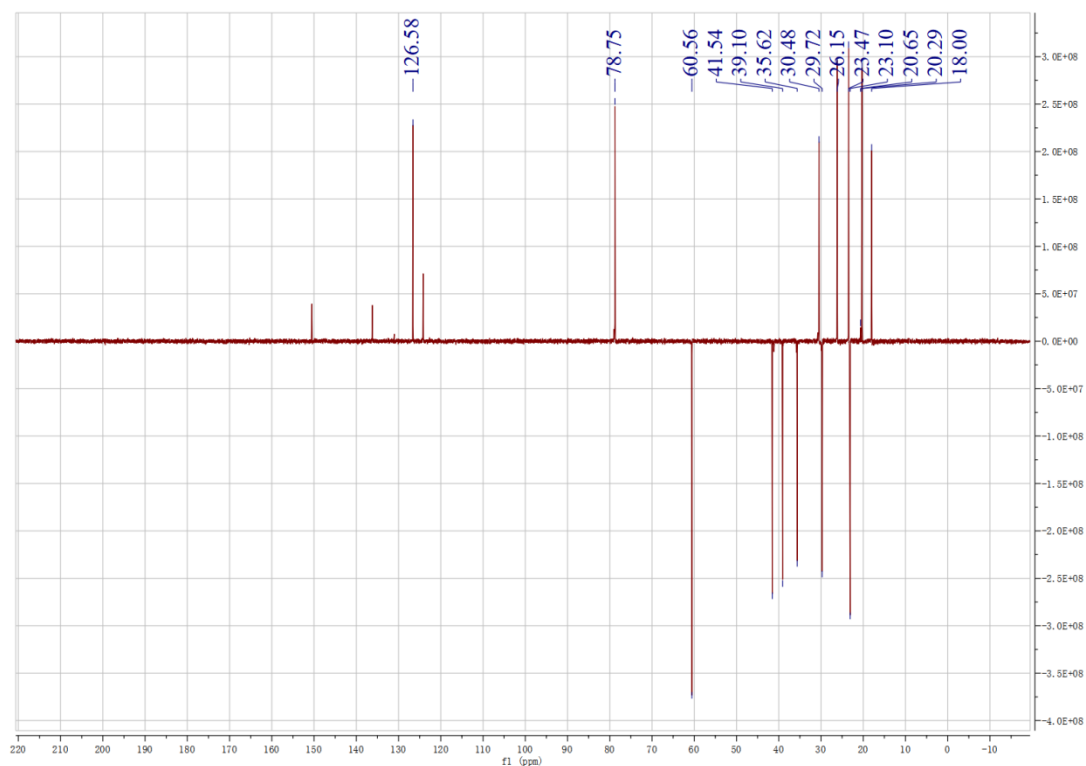

Figure S13:  $^{13}\text{C}$ -NMR-DEPT ( $\theta=135^\circ$ ) spectrum of compound 3

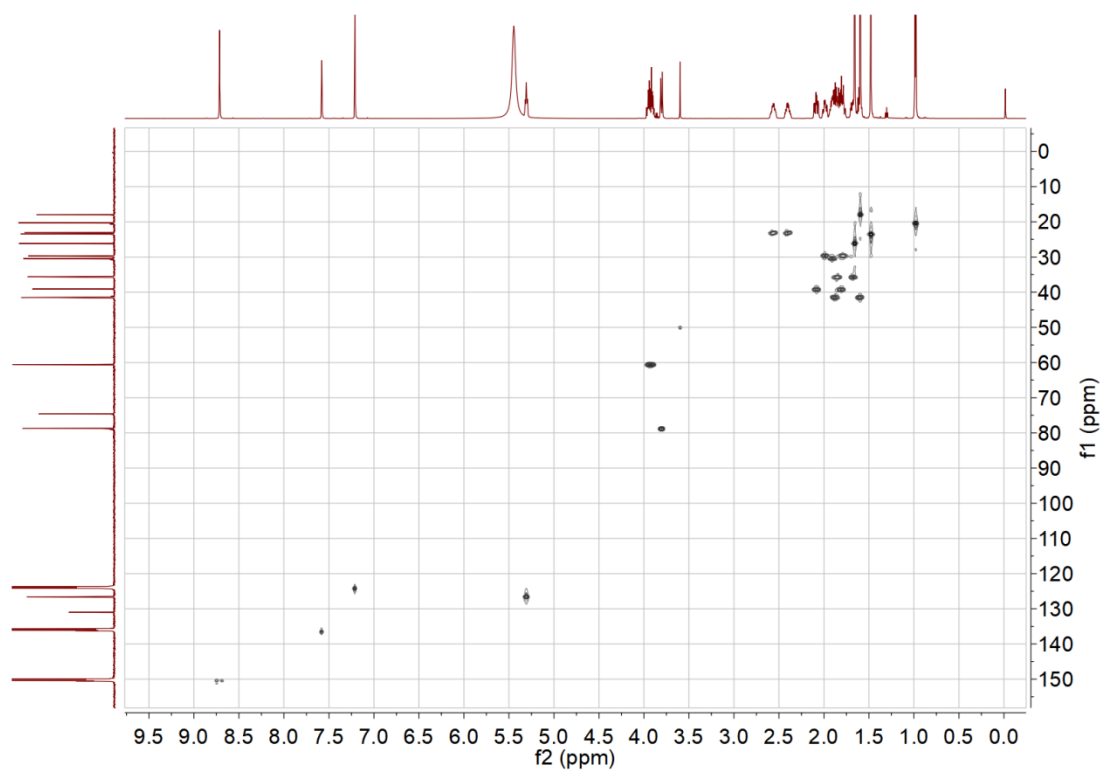

Figure S14: HSQC spectrum of compound 3

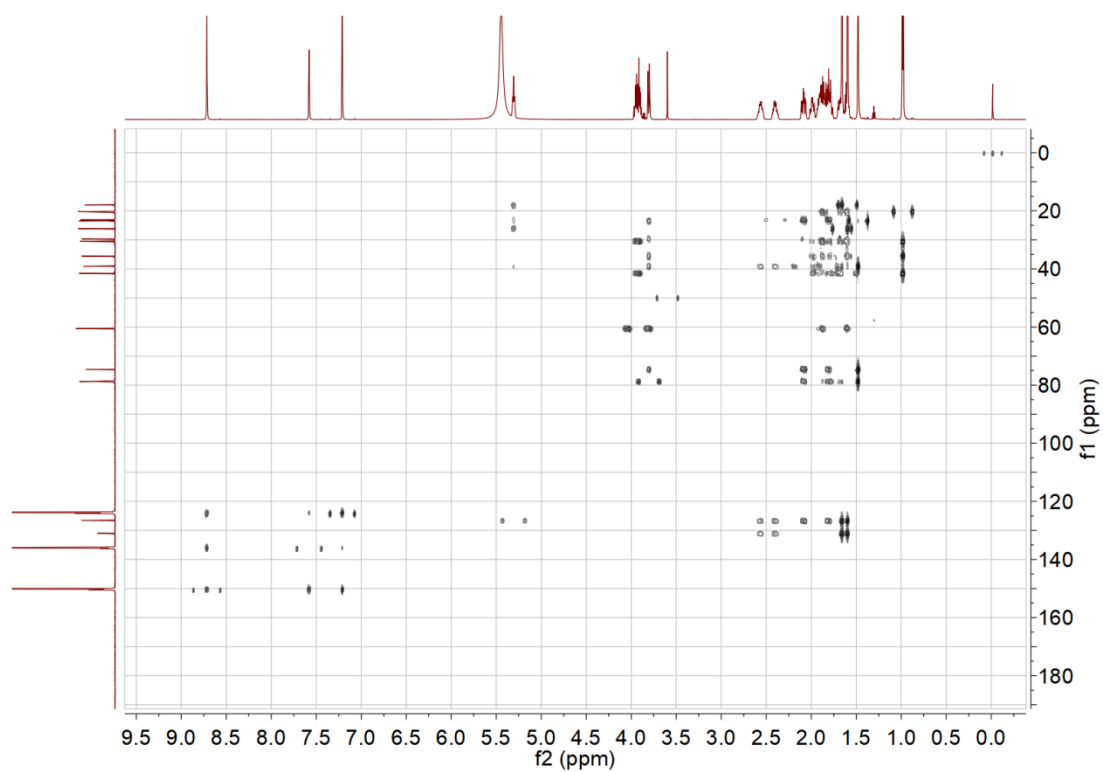

**Figure S15: HMBC spectrum of compound 3**

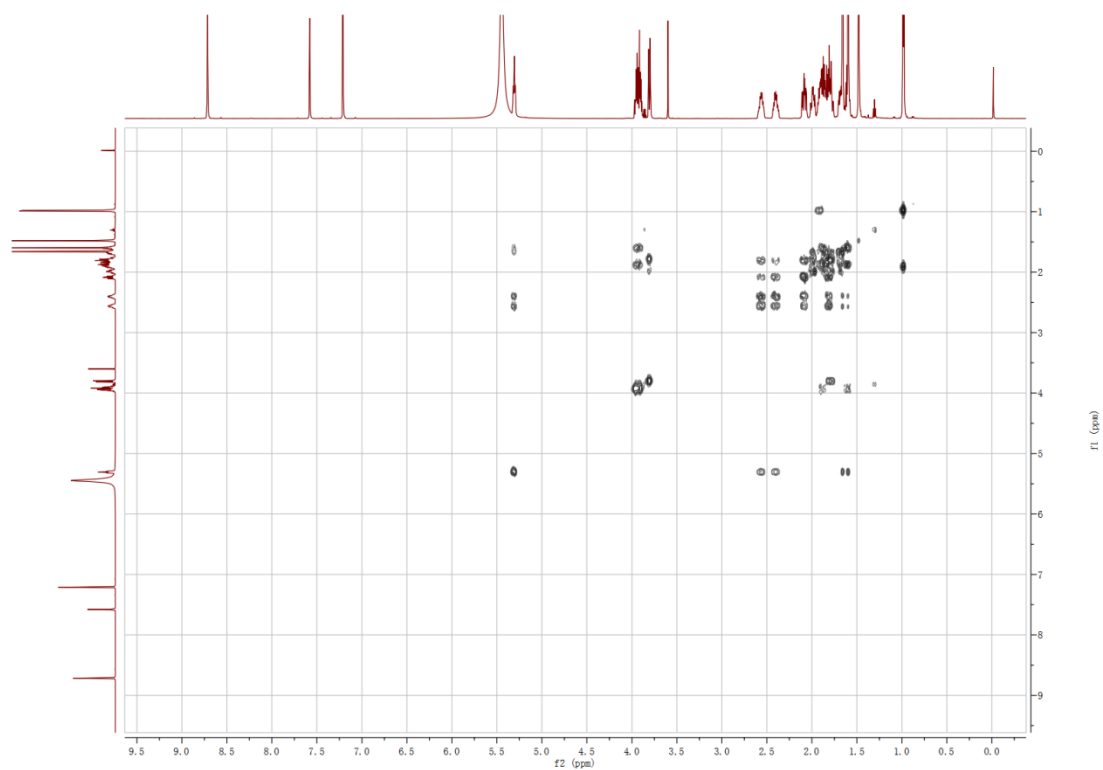

**Figure S16:  $^1\text{H}$ - $^1\text{H}$  COSY spectrum of compound 3**

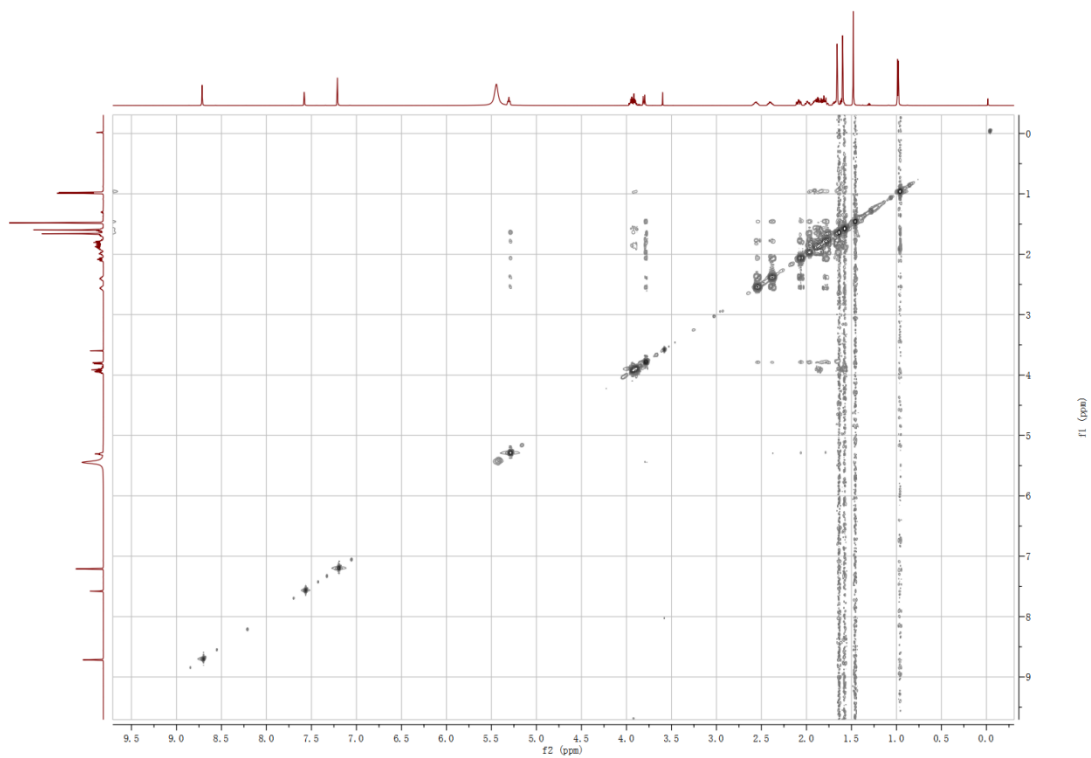

**Figure S17: ROESY spectrum of compound 3**

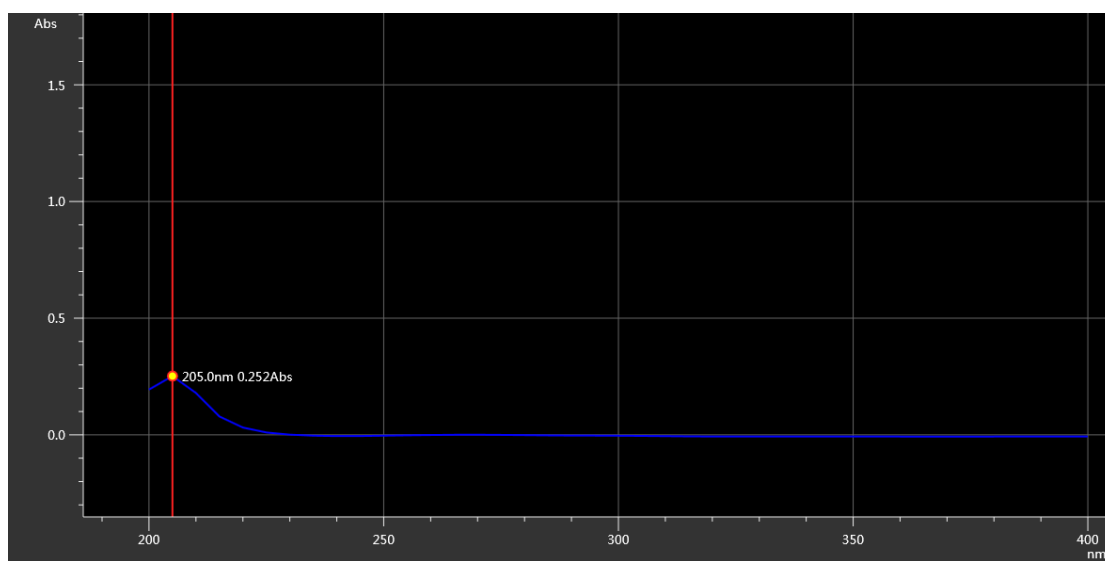

**Figure S18: UV spectrum of compound 3**

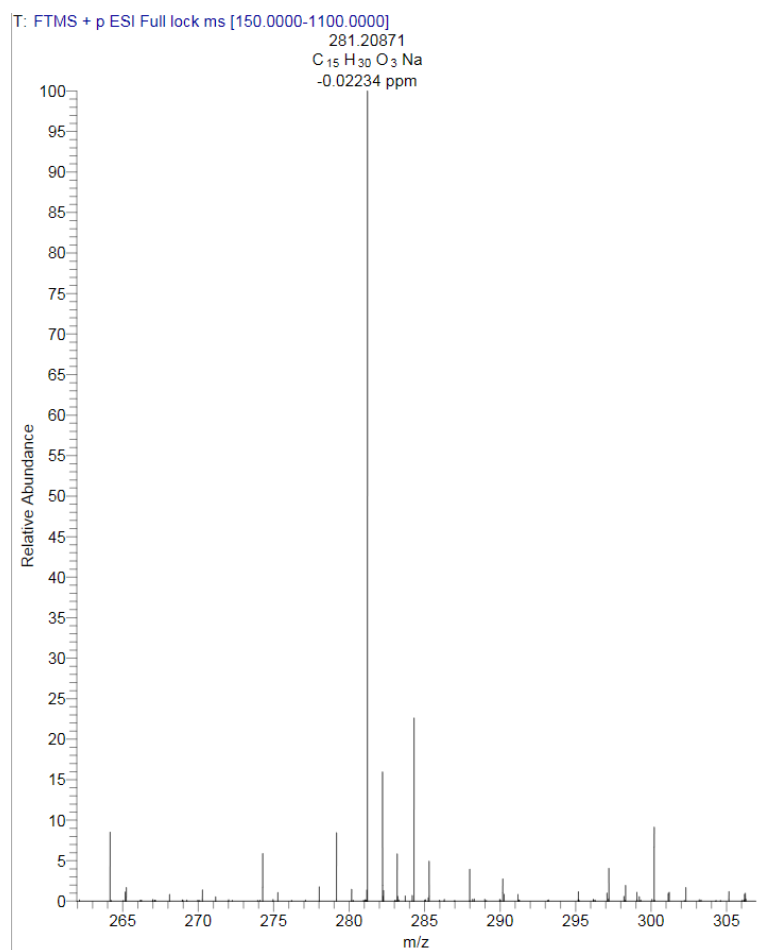

**Figure S19: HR-ESI-MS of compound 3**

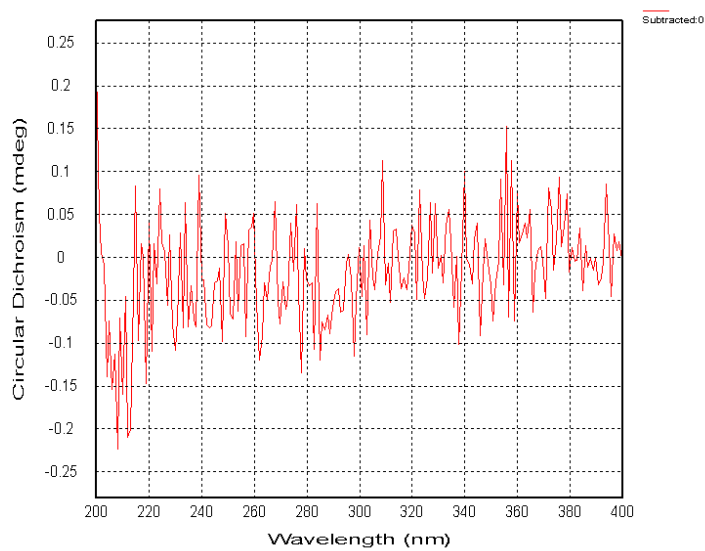

**Figure S20: CD spectrum of compound 3**

## 1. Computational methods

### 1.1 Conformational analysis

Conformational analysis for compound **1** (**Figure S21**) were performed in Yinfo Cloud Platform (<http://cloud.yinfotek.com/>) using Custom Search by Confab [1] at MMFF94 force field with RMSD threshold of 0.5 Å and energy window of 7 kcal/mol.

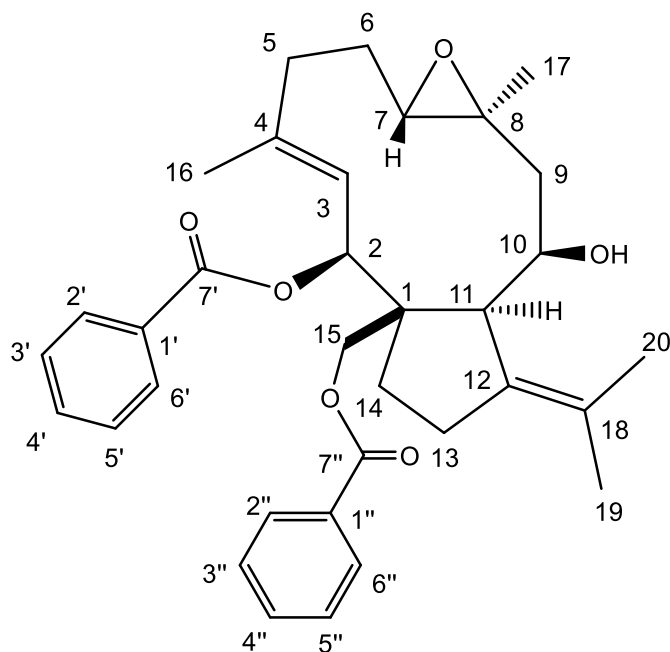

**Figure S21** Chemical structure of compound **1a**.

### 1.2 ECD calculation

The theoretical calculations were carried out using Gaussian 09 [2]. At first, all conformers were optimized at PM6. Room-temperature equilibrium populations were calculated according to Boltzmann distribution law (eq.1), based on which dominative conformers of population over 1% were kept. The chosen conformers were further optimized at B3LYP/6-31G(d,p) in gas phase (**Table S2**). Vibrational frequency analysis confirmed the stable structures. ECD calculations were conducted at

B3LYP/6-311G(d,p) level in methanol with IEFPCM model using Time-dependent Density functional theory (TD-DFT) (**Table S1**). Rotatory strengths for 30 excited states were calculated. The ECD spectrum was simulated using the ECD/UV analysis tool in Yinfo Cloud Platform (<https://cloud.yinfotek.com/>) by overlapping Gaussian functions for each transition according to **eq.2**).

$$\frac{N_i}{N} = \frac{g_i e^{-\frac{E_i}{k_B T}}}{\sum g_i e^{-\frac{E_i}{k_B T}}} \quad (1)$$

where  $N_i$  is the number of conformer  $i$  with energy  $E_i$  and degeneracy  $g_i$  at temperature  $T$ , and  $k_B$  is Boltzmann constant.

$$\Delta\varepsilon(E) = \frac{1}{2.297 \times 10^{-39}} \times \frac{1}{\sqrt{2\pi\sigma}} \sum_i^A \Delta E_i R_i e^{-\left(\frac{E-E_i}{2\sigma}\right)^2} \quad (2)$$

where  $\sigma$  represents the width of the band at  $1/e$  height, while  $\Delta E_i$  and  $R_i$  are the excitation energies and rotatory strengths for transition  $i$ , respectively.

The  $\sigma$  and UV-shift values of compound **1** was set 0.20 eV and -34 nm, respectively. The spectrum of the enantiomers was produced directly by mirror inversion about the horizontal axis.

### 1.3 References

1. Noel M OBoyle, Tim V, ermeersch, Christopher J Flynn, Anita R Maguire Maguire, and Geoffrey R Hutchison. Confab - systematic generation of diverse low-energy conformers. *Journal of Cheminformatics*, 3:3–8, March 2011.
2. M. J. Frisch, G. W. Trucks, H. B. Schlegel, G. E. Scuseria, M. A. Robb, J. R. Cheeseman, G. Scalmani, V. Barone, B. Mennucci, G. A. Petersson, H. Nakatsuji, M. Caricato, X. Li, H. P. Hratchian, A. F. Izmaylov, J. Bloino, G. Zheng, J. L. Sonnenberg, M. Hada, M. Ehara, K. Toyota, R. Fukuda, J. Hasegawa, M. Ishida, T. Nakajima, Y. Honda, O. Kitao, H. Nakai, T. Vreven, J. A. Montgomery, Jr., J. E. Peralta, F. Ogliaro, M. Bearpark, J. J. Heyd, E. Brothers, K. N. Kudin, V. N. Staroverov, R. Kobayashi, J. Normand, K. Raghavachari, A. Rendell, J. C. Burant, S. S. Iyengar, J. Tomasi, M. Cossi, N. Rega, J. M.

Millam, M. Klene, J. E. Knox, J. B. Cross, V. Bakken, C. Adamo, J. Jaramillo, R. Gomperts, R. E. Stratmann, O. Yazyev, A. J. Austin, R. Cammi, C. Pomelli, J. W. Ochterski, R. L. Martin, K. Morokuma, V. G. Zakrzewski, G. A. Voth, P. Salvador, J. J. Dannenberg, S. Dapprich, A. D. Daniels, O. Farkas, J. B. Foresman, J. V. Ortiz, J. Cioslowski, and D. J. Fox. Gaussian 09 Revision D.01. Gaussian Inc. Wallingford CT 2009.

## 2. Energies and Coordinates

### 2.1 Energies at B3LYP theory level

Structures for ECD calculation were shown in **Table S1**

**Table S1** Energies of configurations **1** at B3LYP/6-311G(d,p) in methanol.

| Configuration | Conformer | Structure                                                                         | E (Hartree)    | E (kcal/mol) | Population (%) |
|---------------|-----------|-----------------------------------------------------------------------------------|----------------|--------------|----------------|
| <b>1a</b>     | 5         | 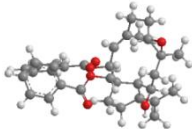 | -1771.47992600 | -1111620.43  | 5.4            |
| <b>1a</b>     | 7         |  | -1771.48264340 | -1111622.13  | 94.6           |



## 2.2 Coordinates at B3LYP theory level

**Table S2** Standard orientations of configurations **1**.

| Conformer <b>1a-5</b> |        |        |                         |           |           |
|-----------------------|--------|--------|-------------------------|-----------|-----------|
| Center                | Atomic | Atomic | Coordinates (Angstroms) |           |           |
| Number                | Number | Type   | X                       | Y         | Z         |
| 1                     | 6      | 0      | 0.702697                | 0.401300  | 1.766000  |
| 2                     | 1      | 0      | 0.127599                | -0.462702 | 2.096100  |
| 3                     | 6      | 0      | 0.323795                | 0.898699  | 0.400200  |
| 4                     | 1      | 0      | 0.814792                | 1.845601  | 0.177900  |
| 5                     | 6      | 0      | 0.708698                | -0.123900 | -0.731900 |
| 6                     | 6      | 0      | 2.258698                | 0.123605  | -0.969500 |
| 7                     | 6      | 0      | 3.176201                | -1.070792 | -1.376800 |
| 8                     | 1      | 0      | 4.135100                | -0.608089 | -1.650400 |
| 9                     | 6      | 0      | 3.501805                | -2.155791 | -0.323300 |
| 10                    | 1      | 0      | 4.247607                | -2.809488 | -0.795100 |
| 11                    | 1      | 0      | 2.630107                | -2.787693 | -0.143700 |
| 12                    | 6      | 0      | 4.071403                | -1.704189 | 1.021200  |
| 13                    | 6      | 0      | 3.216604                | -1.745892 | 2.234600  |
| 14                    | 6      | 0      | 3.373301                | -0.879591 | 3.474100  |
| 15                    | 1      | 0      | 3.542703                | -1.537091 | 4.336900  |
| 16                    | 1      | 0      | 4.258699                | -0.240088 | 3.395300  |
| 17                    | 6      | 0      | 2.109798                | -0.018795 | 3.747000  |
| 18                    | 1      | 0      | 2.304496                | 0.614305  | 4.622700  |
| 19                    | 1      | 0      | 1.283200                | -0.688998 | 4.013600  |
| 20                    | 6      | 0      | 1.709395                | 0.823004  | 2.550100  |
| 21                    | 6      | 0      | 0.058497                | 0.263898  | -2.081500 |
| 22                    | 1      | 0      | 0.126700                | -0.598502 | -2.751800 |
| 23                    | 1      | 0      | -1.000804               | 0.506095  | -1.972300 |
| 24                    | 6      | 0      | 0.886093                | 1.430001  | -2.625100 |
| 25                    | 1      | 0      | 0.467890                | 2.392899  | -2.300200 |
| 26                    | 1      | 0      | 0.879393                | 1.449801  | -3.721200 |
| 27                    | 6      | 0      | 2.281294                | 1.244705  | -2.036500 |
| 28                    | 6      | 0      | 3.328891                | 2.023709  | -2.370800 |
| 29                    | 6      | 0      | 4.690792                | 1.976413  | -1.719600 |
| 30                    | 1      | 0      | 5.029188                | 2.994914  | -1.485900 |
| 31                    | 1      | 0      | 5.447993                | 1.547316  | -2.391400 |
| 32                    | 1      | 0      | 4.705293                | 1.405013  | -0.791600 |
| 33                    | 6      | 0      | 3.228488                | 3.097608  | -3.432000 |
| 34                    | 1      | 0      | 4.071988                | 3.028411  | -4.132900 |
| 35                    | 1      | 0      | 3.287585                | 4.096409  | -2.976000 |
| 36                    | 1      | 0      | 2.304888                | 3.053005  | -4.011900 |

|    |   |   |           |           |           |
|----|---|---|-----------|-----------|-----------|
| 37 | 8 | 0 | 4.175407  | -2.782188 | 1.983800  |
| 38 | 6 | 0 | 5.321001  | -0.843385 | 0.980600  |
| 39 | 1 | 0 | 5.102197  | 0.201115  | 0.738800  |
| 40 | 1 | 0 | 6.018302  | -1.224182 | 0.225000  |
| 41 | 1 | 0 | 5.830801  | -0.871783 | 1.946200  |
| 42 | 1 | 0 | 2.192105  | -2.096095 | 2.089200  |
| 43 | 6 | 0 | 2.544491  | 2.055706  | 2.299100  |
| 44 | 1 | 0 | 2.613589  | 2.646206  | 3.222200  |
| 45 | 1 | 0 | 2.123489  | 2.702505  | 1.526400  |
| 46 | 1 | 0 | 3.575892  | 1.804610  | 2.016100  |
| 47 | 8 | 0 | -1.108506 | 1.157994  | 0.368300  |
| 48 | 6 | 0 | -1.495810 | 2.441593  | 0.568600  |
| 49 | 6 | 0 | -2.978910 | 2.592788  | 0.557400  |
| 50 | 6 | 0 | -3.508615 | 3.875387  | 0.756300  |
| 51 | 1 | 0 | -2.823717 | 4.702989  | 0.908800  |
| 52 | 6 | 0 | -4.887615 | 4.068382  | 0.756900  |
| 53 | 1 | 0 | -5.295219 | 5.063581  | 0.911500  |
| 54 | 6 | 0 | -5.745112 | 2.982279  | 0.558800  |
| 55 | 1 | 0 | -6.821512 | 3.133776  | 0.559500  |
| 56 | 6 | 0 | -5.220408 | 1.703081  | 0.360200  |
| 57 | 1 | 0 | -5.883105 | 0.855779  | 0.207700  |
| 58 | 6 | 0 | -3.840507 | 1.505485  | 0.359000  |
| 59 | 1 | 0 | -3.428404 | 0.515187  | 0.206700  |
| 60 | 8 | 0 | -0.720713 | 3.366596  | 0.730100  |
| 61 | 6 | 0 | 0.346503  | -1.575501 | -0.384600 |
| 62 | 1 | 0 | 0.827504  | -1.906799 | 0.533400  |
| 63 | 1 | 0 | 0.624705  | -2.233700 | -1.206400 |
| 64 | 8 | 0 | -1.070496 | -1.729706 | -0.116400 |
| 65 | 6 | 0 | -1.823494 | -2.379308 | -1.035100 |
| 66 | 6 | 0 | -3.226894 | -2.584313 | -0.567800 |
| 67 | 6 | 0 | -3.644395 | -2.260814 | 0.731200  |
| 68 | 1 | 0 | -2.933096 | -1.837612 | 1.431400  |
| 69 | 6 | 0 | -4.966494 | -2.486918 | 1.113800  |
| 70 | 1 | 0 | -5.286095 | -2.238919 | 2.122300  |
| 71 | 6 | 0 | -5.875592 | -3.034521 | 0.205200  |
| 72 | 1 | 0 | -6.904892 | -3.210625 | 0.506700  |
| 73 | 6 | 0 | -5.460991 | -3.360820 | -1.089100 |
| 74 | 1 | 0 | -6.166490 | -3.789222 | -1.795600 |
| 75 | 6 | 0 | -4.141092 | -3.139416 | -1.473800 |
| 76 | 1 | 0 | -3.795391 | -3.390414 | -2.471100 |
| 77 | 8 | 0 | -1.410793 | -2.755907 | -2.114600 |
| 78 | 1 | 0 | 2.692396  | 0.498707  | -0.035900 |
| 79 | 8 | 0 | 2.676504  | -1.786593 | -2.508700 |

| 80                    | 1      | 0      | 2.606202                | -1.149994 | -3.238500 |
|-----------------------|--------|--------|-------------------------|-----------|-----------|
| <b>Conformer 1a-7</b> |        |        |                         |           |           |
| Center                | Atomic | Atomic | Coordinates (Angstroms) |           |           |
| Number                | Number | Type   | X                       | Y         | Z         |
| 1                     | 6      | 0      | -1.503287               | -1.175016 | -1.407493 |
| 2                     | 1      | 0      | -1.241294               | -0.492914 | -2.215793 |
| 3                     | 6      | 0      | -1.575794               | -0.515417 | -0.056893 |
| 4                     | 1      | 0      | -2.058988               | -1.157221 | 0.679107  |
| 5                     | 6      | 0      | -0.157297               | -0.106104 | 0.496207  |
| 6                     | 6      | 0      | 0.513015                | -1.470697 | 0.932307  |
| 7                     | 6      | 0      | 2.066717                | -1.616783 | 0.885007  |
| 8                     | 1      | 0      | 2.282225                | -2.532381 | 1.445707  |
| 9                     | 6      | 0      | 2.713318                | -1.777377 | -0.520293 |
| 10                    | 1      | 0      | 3.785620                | -1.929267 | -0.337893 |
| 11                    | 1      | 0      | 2.636309                | -0.844078 | -1.086593 |
| 12                    | 6      | 0      | 2.215929                | -2.916982 | -1.408293 |
| 13                    | 6      | 0      | 1.260326                | -2.617490 | -2.506093 |
| 14                    | 6      | 0      | 0.230135                | -3.564100 | -3.103493 |
| 15                    | 1      | 0      | 0.511037                | -3.773397 | -4.143493 |
| 16                    | 1      | 0      | 0.232343                | -4.528100 | -2.583293 |
| 17                    | 6      | 0      | -1.198771               | -2.950913 | -3.090793 |
| 18                    | 1      | 0      | -1.901764               | -3.700520 | -3.477193 |
| 19                    | 1      | 0      | -1.219379               | -2.104013 | -3.787493 |
| 20                    | 6      | 0      | -1.616875               | -2.479517 | -1.710193 |
| 21                    | 6      | 0      | -0.297405               | 0.682895  | 1.822307  |
| 22                    | 1      | 0      | 0.642191                | 1.204104  | 2.015407  |
| 23                    | 1      | 0      | -1.083612               | 1.440388  | 1.760307  |
| 24                    | 6      | 0      | -0.544795               | -0.360707 | 2.919207  |
| 25                    | 1      | 0      | -1.613094               | -0.432317 | 3.162107  |
| 26                    | 1      | 0      | -0.033498               | -0.082502 | 3.848307  |
| 27                    | 6      | 0      | -0.038183               | -1.682502 | 2.353007  |
| 28                    | 6      | 0      | -0.141872               | -2.852003 | 3.010107  |
| 29                    | 6      | 0      | 0.250140                | -4.194100 | 2.439907  |
| 30                    | 1      | 0      | -0.489653               | -4.956907 | 2.716907  |
| 31                    | 1      | 0      | 1.215644                | -4.540391 | 2.836607  |
| 32                    | 1      | 0      | 0.319140                | -4.186499 | 1.350607  |
| 33                    | 6      | 0      | -0.680371               | -2.938308 | 4.420707  |
| 34                    | 1      | 0      | 0.029334                | -3.468202 | 5.071707  |
| 35                    | 1      | 0      | -1.615366               | -3.516617 | 4.447707  |
| 36                    | 1      | 0      | -0.876980               | -1.962610 | 4.869107  |
| 37                    | 8      | 0      | 2.650928                | -2.822678 | -2.787293 |
| 38                    | 6      | 0      | 2.386742                | -4.317380 | -0.854793 |
| 39                    | 1      | 0      | 1.811043                | -4.480985 | 0.059607  |

|    |   |   |           |           |           |
|----|---|---|-----------|-----------|-----------|
| 40 | 1 | 0 | 3.444143  | -4.481470 | -0.613493 |
| 41 | 1 | 0 | 2.096648  | -5.070383 | -1.591093 |
| 42 | 1 | 0 | 0.978016  | -1.568193 | -2.612493 |
| 43 | 6 | 0 | -2.066465 | -3.558021 | -0.756493 |
| 44 | 1 | 0 | -2.933261 | -4.082229 | -1.181193 |
| 45 | 1 | 0 | -2.356869 | -3.174624 | 0.223507  |
| 46 | 1 | 0 | -1.288158 | -4.318314 | -0.607493 |
| 47 | 8 | 0 | -2.381205 | 0.692576  | -0.177693 |
| 48 | 6 | 0 | -3.701504 | 0.580064  | 0.119007  |
| 49 | 6 | 0 | -4.443515 | 1.854257  | -0.100593 |
| 50 | 6 | 0 | -5.810016 | 1.872744  | 0.212607  |
| 51 | 1 | 0 | -6.266107 | 0.967440  | 0.599307  |
| 52 | 6 | 0 | -6.554626 | 3.034138  | 0.025707  |
| 53 | 1 | 0 | -7.613226 | 3.044028  | 0.270107  |
| 54 | 6 | 0 | -5.939937 | 4.184443  | -0.476493 |
| 55 | 1 | 0 | -6.521245 | 5.090938  | -0.623093 |
| 56 | 6 | 0 | -4.579237 | 4.169956  | -0.791593 |
| 57 | 1 | 0 | -4.101245 | 5.063160  | -1.183993 |
| 58 | 6 | 0 | -3.829926 | 3.009363  | -0.605293 |
| 59 | 1 | 0 | -2.774426 | 2.993972  | -0.851893 |
| 60 | 8 | 0 | -4.213394 | -0.444841 | 0.525407  |
| 61 | 6 | 0 | 0.507795  | 0.765203  | -0.582393 |
| 62 | 1 | 0 | -0.188013 | 1.545996  | -0.897893 |
| 63 | 1 | 0 | 0.793600  | 0.201705  | -1.469793 |
| 64 | 8 | 0 | 1.696889  | 1.424314  | -0.072693 |
| 65 | 6 | 0 | 2.220480  | 2.395118  | -0.876693 |
| 66 | 6 | 0 | 3.392273  | 3.084529  | -0.268793 |
| 67 | 6 | 0 | 4.105565  | 3.975936  | -1.083693 |
| 68 | 1 | 0 | 3.778464  | 4.118133  | -2.108293 |
| 69 | 6 | 0 | 5.209059  | 4.656646  | -0.577493 |
| 70 | 1 | 0 | 5.760652  | 5.342351  | -1.214293 |
| 71 | 6 | 0 | 5.604961  | 4.457050  | 0.747807  |
| 72 | 1 | 0 | 6.466256  | 4.988658  | 1.143507  |
| 73 | 6 | 0 | 4.893569  | 3.576543  | 1.565507  |
| 74 | 1 | 0 | 5.197170  | 3.423146  | 2.597107  |
| 75 | 6 | 0 | 3.789675  | 2.890133  | 1.062207  |
| 76 | 1 | 0 | 3.237381  | 2.216228  | 1.707507  |
| 77 | 8 | 0 | 1.761377  | 2.650314  | -1.970393 |
| 78 | 1 | 0 | 0.143423  | -2.259901 | 0.270307  |
| 79 | 8 | 0 | 2.744807  | -0.597577 | 1.611207  |
| 80 | 1 | 0 | 2.661400  | 0.213322  | 1.081607  |

---

### 3. Experimental and calculated ECD spectra

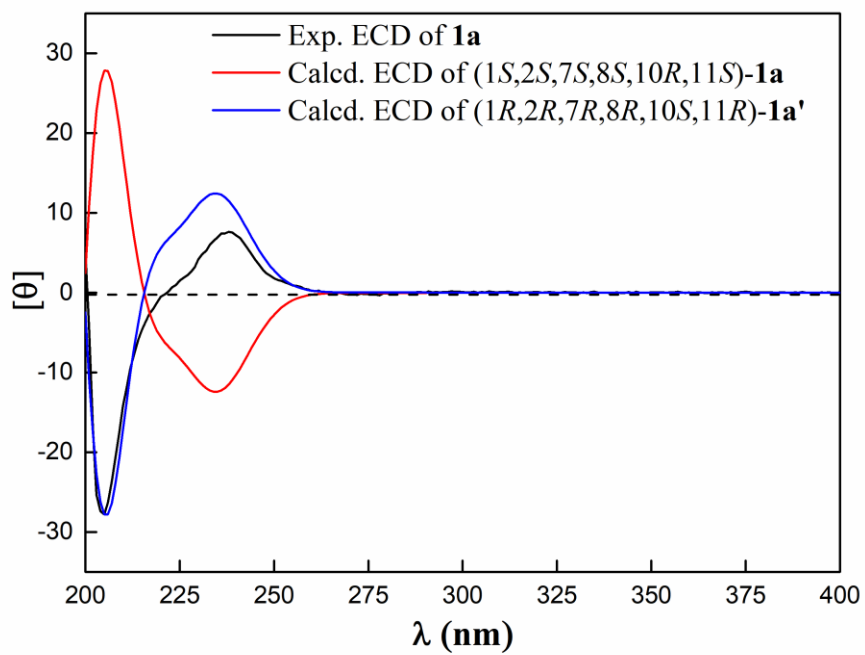

**Figure S22** Calculated ECD spectra of compound **1** was compared with the experimental.
